# Supplementary material
Source: HighWire-hosted journal article supplement (https://fn.bmj.com/content/106/2/131)
Supplement: inline-supplementary-material-1 [file inline-supplementary-material-1.pdf]

Supplementary Table 1. Perinatal data of enrolled VLBWI cohort and VLBWIs who were not included in the study

|                                                          | Study cohort (n=15842) | Excluded<br>(n=1413) | p value |
|----------------------------------------------------------|------------------------|----------------------|---------|
| Gestational age, weeks                                   | 28.7 (26.3–30.9)       | 29.0 (26.4–31.3)     | 0.01    |
| Birth weight, g                                          | 1046 (762–1298)        | 1062 (764–1324)      | 0.23    |
| Small for gestational age (<10 <sup>th</sup> percentile) | 4624 (29.6)            | 345 (29.3)           | 0.84    |
| Male                                                     | 8073 (51.0)            | 732 (52.0)           | 0.47    |
| Premature rupture of membranes                           | 4864 (30.7)            | 238 (40.1)           | <0.001  |
| Clinical chorioamnionitis                                | 3031 (20.1)            | 138 (26.1)           | <0.001  |
| Preeclampsia                                             | 4275 (27.2)            | 134 (25.0)           | 0.28    |
| Maternal diabetes mellitus                               | 713 (4.6)              | 23 (4.3)             | 0.92    |
| Maternal age, years                                      | 33 (29–36)             | 32 (28–36)           | 0.05    |
| Antenatal steroids                                       | 9198 (58.8)            | 334 (53.9)           | 0.02    |
| Cesarean section                                         | 12,384 (78.2)          | 586 (72.6)           | <0.001  |

Data are expressed as median (interquartile range) or number (%).

VLBWI, very-low-birth-weight infant
